# Supplementary material
Source: PubMed Central journal article supplement (PMC6927482)
Supplement: NIHMS1538016-supplement-1.pdf [file NIHMS1538016-supplement-1.pdf]

Supplemental Table S1. Proportion of racial differences in obesity attributable to individual stressors

| Predictors            | Black vs. White        | Percent explained | US-born Hispanic vs. White | Percent explained | Non-US-born Hispanic vs. White | Percent explained |
|-----------------------|------------------------|-------------------|----------------------------|-------------------|--------------------------------|-------------------|
|                       | Coeff (95% CI)         |                   | Coeff (95% CI)             |                   | Coeff (95% CI)                 |                   |
| Financial stress      | 0.078 (0.003,0.153)*   | 3.66%             | 0.107 (-0.009,0.022)       | 5.28%             | 0.0003 (-0.004,0.005)          | 0.20%             |
| Stressful life events | 0.045 (-0.005,0.014)   | 2.12%             | 0.003 (-0.004,0.009)       | 1.36%             | -0.003 (-0.007,0.001)          | 2.00%             |
| Job discrimination    | -0.0003(-0.002,0.002)  | 0.16%             | 0.004 (-0.003,0.011)       | 1.88%             | -0.003 (-0.007,0.001)          | 0.02%             |
| Neighborhood stress   | 0.007 (-0.003,0.171)   | 3.36%             | 0.013 (0.001,0.0252)*      | 6.48%             | 0.002 (-0.002,0.006)           | 1.00%             |
| Life discrimination   | 0.001(-0.011,0.130)    | 0.52%             | 0.010 (-0.004,0.024)       | 4.85%             | -0.005 (-0.015,0.004)          | 3.23%             |
| Job stress            | -0.0003 (-0.003,0.003) | 0.01%             | 0.0004 (-0.003,0.003)      | 0.19%             | 0.0003(-0.004,0.005)           | 0.18%             |
| Childhood stress      | 0.00003 (-0.004,0.004) | 0.01%             | 0.005 (-0.003,0.013)       | 2.44%             | 0.006 (-0.002,0.014)           | 3.46%             |
| Relationship stress   | 0.005 (-0.005,0.0149)  | 2.39%             | 0.005 (-0.005,0.154)       | 2.50%             | 0.005 (-0.006,0.156)           | 2.95%             |

All results are weighted. \*P < 0.05; \*\* P < 0.01

Supplemental Table S2a. Proportion of racial differences in obesity attributable to age and sex, marital status/parental status, health behaviors, socioeconomic status, and cumulative stressors (Females only)

| Predictors                                                           | Black vs. White<br>Coeff (95% CI) | Percent explained | US-born Hispanic vs. White<br>Coeff (95% CI) | Percent explained | Non-US-born Hispanic vs. White<br>Coeff (95% CI) | Percent explained |
|----------------------------------------------------------------------|-----------------------------------|-------------------|----------------------------------------------|-------------------|--------------------------------------------------|-------------------|
| <b>Age</b>                                                           | -.0008 (-.009, .007)              | -0.31%            | -.03 (-.06, -.01)                            | -20.74%           | -.01 (-.03, .0003)                               | -6.78%            |
| <b>Marital status</b>                                                |                                   |                   |                                              |                   |                                                  |                   |
| Not Married (Reference)                                              |                                   |                   |                                              |                   |                                                  |                   |
| Married                                                              | -.01 (-.03, .003)                 | -4.48%            | -.0006 (-.01, .009)                          | -0.34%            | .03 (.003, .06)                                  | 13.69%            |
| <b>Parental status</b>                                               |                                   |                   |                                              |                   |                                                  |                   |
| Does not have children (Reference)                                   |                                   |                   |                                              |                   |                                                  |                   |
| Has child(ren)                                                       | .005 (-.02, .03)                  | 1.89%             | -.005 (-.03, .02)                            | -3.00%            | .005 (-.03, .04)                                 | 2.28%             |
| <b>Physical Activity</b>                                             |                                   |                   |                                              |                   |                                                  |                   |
| No activity (Reference)                                              |                                   |                   |                                              |                   |                                                  |                   |
| Insufficient activity                                                | -.002 (-.006, .003)               | -.63%             | -.00006 (-.001, .0009)                       | -0.04             | -.0009 (-.007, .005)                             | -.42%             |
| Meeting recommended physical activity                                | .0002 (-.001, .002)               | .07%              | -.0003 (-.003, .003)                         | -1.7%             | .00006 (-.001, .001)                             | .03%              |
| <b>Diet</b>                                                          |                                   |                   |                                              |                   |                                                  |                   |
| Not meeting recommended fruit and vegetables intake (Reference)      |                                   |                   |                                              |                   |                                                  |                   |
| Meeting recommended fruit and vegetables intake                      | -.002 (-.01, .008)                | -.92%             | -.01 (-.02, .0001)                           | -7.47%            | -.01 (-.03, .004)                                | -5.00%            |
| <b>Education</b>                                                     |                                   |                   |                                              |                   |                                                  |                   |
| Less than high school (Reference)                                    |                                   |                   |                                              |                   |                                                  |                   |
| High school                                                          | -.0007 (-.004, .002)              | -.28%             | -.002 (-.008, .003)                          | -1.44%            | .0001 (-.003, .003)                              | .05%              |
| Some college                                                         | -.008 (-.02, .004)                | -2.95%            | -.0009 (-.005, .003)                         | -.54%             | -.005 (-.02, .01)                                | -2.27%            |
| College degree and above                                             | .05 (.02, .09)**                  | 20.07%            | .05 (.02, .08)                               | 31.09%            | .03 (-.02, .08)                                  | 13.65%            |
| <b>Income</b>                                                        |                                   |                   |                                              |                   |                                                  |                   |
| Less than \$10000 (Reference)                                        |                                   |                   |                                              |                   |                                                  |                   |
| \$10,000 through \$29,999                                            | .002 (-.01, .02)                  | .71%              | .01 (-.003, .02)                             | 6.24%             | .002 (-.006, .01)                                | .97%              |
| \$30,000 through \$49,999                                            | .006 (-.01, .03)                  | 2.16%             | .01 (-.003, .03)                             | 7.50%             | .007 (-.01, .03)                                 | 3.09%             |
| \$50,000 or more                                                     | -.0006 (-.003, .002)              | -.22%             | -.0004 (-.005, .004)                         | -0.23%            | .0001 (-.002, .002)                              | .06%              |
| Missing                                                              | -.006 (-.02, .01)                 | -2.41%            | -.002 (-.01, .01)                            | -1.05%            | .006 (-.02, .03)                                 | 2.55%             |
| <b>Employment status</b>                                             |                                   |                   |                                              |                   |                                                  |                   |
| Does not have a job (Reference)                                      |                                   |                   |                                              |                   |                                                  |                   |
| Has a job                                                            | -.002 (-.008, .003)               | -.83%             | -.005 (-.01, .003)                           | -3.00%            | .002 (-.009, .01)                                | .72%              |
| <b>Number of domains of high stress exposure (cumulative stress)</b> |                                   |                   |                                              |                   |                                                  |                   |
| 0 (Reference)                                                        |                                   |                   |                                              |                   |                                                  |                   |
| 1                                                                    | -.001 (-.005, .002)               | -.45%             | -.005 (-.01, .003)                           | -3.34%            | .003 (-.005, .01)                                | 1.47%             |
| 2                                                                    | .003 (-.002, .009)                | 1.26%             | .005 (-.005, .01)                            | 3.07%             | .003 (-.004, .01)                                | 1.36%             |
| 3                                                                    | .006 (-.006, .02)                 | 2.17%             | .03 (.006, .04)                              | 15.36%            | .005 (-.004, .01)                                | 2.11%             |
| 4+                                                                   | .008 (-.001, .02)                 | 3.07%             | .02 (.003, .04)                              | 12.31%            | -.004 (-.01, .007)                               | -1.80%            |
| Explained total                                                      | .05 (.006, .09)*                  | 17.93%            | .06 (.005, .11)*                             | 32.22%            | .06 (-.02, .13)                                  | 25.77%            |
| Unexplained                                                          | .22 (.15, .29)                    | 82.07%            | .11 (.03, .19)                               | 67.78%            | .16 (.06, .27)                                   | 74.23%            |
| Total predicted gap                                                  | .27 (.21, .32)                    |                   | .16 (.09, .24)                               |                   | .22 (.14, .30)                                   |                   |

All results are weighted. \*P &lt; 0.05; \*\* P &lt; 0.01

Supplemental Table S2b. Proportion of racial differences in obesity attributable to age and sex, marital status/parental status, health behaviors, socioeconomic status, and cumulative stressors (Males only)

| Predictors                                                           | Black vs. White<br>Coeff (95% CI) | Percent explained | US-born Hispanic vs. White<br>Coeff (95% CI) | Percent explained | Foreign-born Hispanic vs. White<br>Coeff (95% CI) | Percent explained |
|----------------------------------------------------------------------|-----------------------------------|-------------------|----------------------------------------------|-------------------|---------------------------------------------------|-------------------|
| <b>Age</b>                                                           | .001 (-.03, .03)                  | .91%              | -.003 (-.04, .04)                            | -1.13%            | -.01 (-.05, .03)                                  | -10.77%           |
| <b>Marital status</b>                                                |                                   |                   |                                              |                   |                                                   |                   |
| Not Married (Reference)                                              |                                   |                   |                                              |                   |                                                   |                   |
| Married                                                              | -.002 (-.04, .03)                 | -1.43%            | -.001 (-.009, .006)                          | -.55%             | .01 (-.05, .07)                                   | 10.86%            |
| <b>Parental status</b>                                               |                                   |                   |                                              |                   |                                                   |                   |
| Does not have children (Reference)                                   |                                   |                   |                                              |                   |                                                   |                   |
| Has child(ren)                                                       | .02 (-.34, .37)                   | 13.04%            | .007 (-.008, .02)                            | 3.20%             | .02 (-.08, .13)                                   | 20.87%            |
| <b>Physical Activity</b>                                             |                                   |                   |                                              |                   |                                                   |                   |
| No activity (Reference)                                              |                                   |                   |                                              |                   |                                                   |                   |
| Insufficient activity                                                | -.004 (-.08, .07)                 | -2.81%            | .003 (-.008, .01)                            | 1.25%             | .004 (-.02, .02)                                  | 3.17%             |
| Meeting recommended physical activity                                | .003 (-.05, .05)                  | 1.87%             | -.008 (-.03, .009)                           | -3.57%            | -.00004 (-.004, .004)                             | -.04%             |
| <b>Diet</b>                                                          |                                   |                   |                                              |                   |                                                   |                   |
| Not meeting recommended fruit and vegetables intake (Reference)      |                                   |                   |                                              |                   |                                                   |                   |
| Meeting recommended fruit and vegetables intake                      | -.0005 (-.01, .009)               | -.38%             | -.001 (-.006, .004)                          | -.47%             | -.004 (-.02, .01)                                 | -3.08%            |
| <b>Education</b>                                                     |                                   |                   |                                              |                   |                                                   |                   |
| Less than high school (Reference)                                    |                                   |                   |                                              |                   |                                                   |                   |
| High school                                                          | .02 (-.31, .35)                   | 13.22%            | .02 (-.01, .06)                              | 10.72%            | .003 (-.01, .02)                                  | 2.12%             |
| Some college                                                         | .002 (-.03, .04)                  | 1.39%             | .01 (-.009, .03)                             | 4.24%             | -.001 (-.008, .006)                               | -.86%             |
| College degree and above                                             | -.05 (-.93, .83)                  | -35.75%           | -.07 (-.17, .02)                             | -32.65%           | -.04 (-.12, .05)                                  | -29.83%           |
| <b>Income</b>                                                        |                                   |                   |                                              |                   |                                                   |                   |
| Less than \$10000 (Reference)                                        |                                   |                   |                                              |                   |                                                   |                   |
| \$10,000 through \$29,999                                            | .002 (-.04, .04)                  | 1.17%             | .01 (-.008, .03)                             | 4.41%             | .003 (-.01, .02)                                  | 2.34%             |
| \$30,000 through \$49,999                                            | -.007 (-.14, .13)                 | -5.27%            | -.003 (-.02, .01)                            | -1.21%            | -.01 (-.06, .03)                                  | -12.53%           |
| \$50,000 or more                                                     | -.001 (-.02, .02)                 | -.80%             | -.009 (-.03, .01)                            | -3.99%            | -.006 (-.03, .02)                                 | -5.32%            |
| Missing                                                              | .006 (-.11, .12)                  | 4.25%             | .008 (-.02, .03)                             | 3.55%             | .02 (-.04, .08)                                   | 15.22%            |
| <b>Employment status</b>                                             |                                   |                   |                                              |                   |                                                   |                   |
| Does not have a job (Reference)                                      |                                   |                   |                                              |                   |                                                   |                   |
| Has a job                                                            | -.005 (-.09, .08)                 | -3.26%            | -.0004 (-.004, .003)                         | -.16%             | .0006 (-.03, .03)                                 | .49%              |
| <b>Number of domains of high stress exposure (cumulative stress)</b> |                                   |                   |                                              |                   |                                                   |                   |
| 0 (Reference)                                                        |                                   |                   |                                              |                   |                                                   |                   |
| 1                                                                    | -.003 (-.07, .06)                 | -2.39%            | -.003 (-.01, .007)                           | -1.31%            | .0002 (-.002, .003)                               | .14%              |
| 2                                                                    | .002 (-.03, .03)                  | 1.14%             | .004 (-.007, .02)                            | 1.81%             | .00005 (-.002, .002)                              | .04%              |
| 3                                                                    | .006 (-.11, .12)                  | 4.49%             | .03 (-.007, .06)                             | 11.45%            | .002 (-.007, .01)                                 | 1.50%             |
| 4+                                                                   | .01 (-.24, .26)                   | 9.76%             | -.003 (-.01, .007)                           | -1.32%            | -.0004 (-.004, .003)                              | -.37%             |
| Explained total                                                      | -.001 (-.05, .04)                 | -0.86%            | -.01 (-.11, .08)                             | -5.70%            | -.007 (-.08, .07)                                 | -6.04%            |
| Unexplained                                                          | .14 (.06, .22)                    | 100%              | .24 (.11, .37)                               | 100%              | .13 (.01, .24)                                    | 100%              |
| Total predicted gap                                                  | .14 (.08, .20)                    |                   | .23 (.12, .33)                               |                   | .12 (.03, .20)                                    |                   |

All results are weighted. \*P < 0.05; \*\* P < 0.01
